# Supplementary material for: Large yellow tea polysaccharides ameliorate obesity-associated metabolic syndrome by promoting M2 polarization of adipose tissue macrophages
Source: Royal Society of Chemistry journal article supplement (doi:10.1039/d3fo01691a), 2023-01-01
Supplement: d3fo01691a1.xlsx [file d3fo01691a1.xlsx]

## Sheet: Fig. 1
Body weight (g)
weeks	ND						ND+LPY-H						HFD						HFD-LYP-L						HFD-LYP-H
0	20.6	21.4	19.8	19.5	20.3	18.7	20	21.8	20	20.7	21.3	20	20.9	20	18.5	20	20	20.6	20	21.7	19	18.6	21.4	21	22	21	20	18.9	20	20
1	21.3	22.3	21.7	21.5	23.3	20.6	21.5	23.5	20.6	21.2	19.2	22.6	21.7	20.5	20.3	21.2	21.5	20	21.2	20.5	21.2	20.3	19.2	22.6	22.2	23.1	21	22	21.2	20.6
2	21.9	22.5	20.8	23.2	21.4	24.8	24.1	21	22.2	22.2	22.6	23.6	22.3	25.6	22.4	23.2	24.9	23.6	22.2	24.2	22.2	23.1	24.5	21.1	24.9	23.1	23.9	26.3	23.7	22.8
3	22.2	22.5	21.5	24.1	22.4	26.3	25.1	22.1	23.1	23.1	22.8	24.5	24.2	27.6	24.3	25.6	27.2	25	25.6	24.4	25.7	28.3	24.7	23.3	23.2	26.8	23.9	25.4	25.4	22.3
4	23.1	22.7	22.1	24.8	21.7	26.6	23.8	21.9	23	23.3	23.4	25.5	25.6	29.7	26.5	26.3	28.6	27.2	26.7	25.1	26.8	29.2	26.4	24.8	23.9	27.8	24.7	26.4	25.6	23
5	24.5	23.6	23.6	26.1	22.6	28.5	25.8	22.4	23.9	24.7	25.3	26.5	28.1	31	28.6	28.6	31.1	29.8	28	26.7	27.6	31.1	28.1	26	24.7	30	25.9	28.1	27	24
6	24.5	24.5	23.7	24.9	23.7	29.4	27.6	23.3	24.9	26.3	26.6	26.6	30	37.6	30	30.7	34.1	30.5	30.7	28.1	30	33.8	31.3	28.4	25.1	32	27.8	30.7	28.4	25.8
7	25.6	25.2	25.1	27.7	24.6	30.8	27.4	24.5	25.2	27.1	27.7	28.4	32	41	31.8	31.1	37.7	32.3	32.3	30	31.3	35.7	31.6	29.3	26	33.5	28.4	31.1	29.5	26.3
8	26.4	25.3	25.2	27.7	24.2	31.7	28.9	24.9	26.1	28.1	28.9	29.3	33.5	43.3	32.7	33.5	40.6	35.4	34	31.7	32.7	39	33	31.6	28	35.6	30.8	32	32.7	28.4
9	27	25.4	26.2	28.2	24.9	32.2	28.9	25.4	27	28.2	28.7	29.1	36.2	46.2	35.2	36.2	42.4	39	32.4	43.5	33.8	38	33.4	30	30.6	32.6	33.4	31.4	35.8	30.7
10	27.7	26	26	28.6	25	31.3	29	25.5	27	27.9	29	29	38.7	49.9	38	39.6	42.4	41	33.6	46	36.6	40.4	35.6	32	32.1	35	35.5	33	38.1	33.5
11	27.4	26.6	26.3	29.1	25.8	34	29.8	25.3	27.2	27.9	30.1	27.6	40.6	51.7	42.1	42.1	45.2	47.7	34.7	47.4	38.9	41.9	38.4	34.1	34.1	35	37.5	35.1	40.7	36.6
12	27.8	26.8	26.2	29.3	25.3	34	28.8	25.1	27	27	29	28.1	43	54.1	45.8	46.2	49.6	50.1	40.1	35.5	40.6	45.8	44.3	39.5	33.2	39.5	39	42.2	37.9	33.6
Body weight gain (g)
ND	ND+LPY-H	HFD	HFD-LYP-L	HFD-LYP-H
5.7	4.2	24.5	20.2	11.7
3.8	3.1	32.3	19.5	13.5
3.7	8.4	27.3	20	14.4
6.7	6.6	25.4	18.6	17
1.7	3.4	23.3	21.4	13.5
6.1	2.7	28.5	18.5	19.4
2.4	3.6	25.3	21.5	15.2
6.2	6.2	24.8	24.5	17.4
Fat mass/BW
ND	ND+LPY-H	HFD	HFD-LYP-L	HFD-LYP-H
10.364	10.599	33.696	28.368	27.605
9.801	10.473	37.697	28.26	23.424
10.03	11.022	38.126	28.919	21.042
10.76	11.195	39.186	30.494	23.733
10.545	9.339	35.81	28.979	24.602
14.753	11.008	34.781	26.08	25.045
8.833	5.299	33.911	29.35	26.319
10.066	11.674	34.366	27.02	24.283
11.608	9.773	33.69	27.968	25.548
9.661	9.771	33.376	30.813	26.5
Lean mass/BW
ND	ND+LPY-H	HFD	HFD-LYP-L	HFD-LYP-H
77.8691	76.9431	53.5181	62.6903	44.5625
77.8346	75.5462	50.9291	52.017	58.0727
76.4545	77.7312	59.3475	57.8808	55.7526
75.8007	75.0496	57.56	58.7764	47.8143
77.4863	78.6678	59.3175	56.7532	39.7838
70.296	89.1734	57.9701	59.5014	49.1627
78.5833	82.1418	62.0831	53.8874	54.3759
78.9931	76.6092	61.0325	51.7009	58.0073
76.024	77.1164	55.7748	43.1756	56.0842
76.6213	76.0615	54.4365	58.9068	58.9326
Fat weight (g)
	ND								ND+LPY-H								HFD								HFD+LYP-L								HFD+LYP-H
EAT	0.34	0.44	0.46	0.5	0.44	0.3651	0.3747	0.5049	0.3119	0.4597	0.4734	0.4121	0.2843	0.453	0.4158	0.312	3.4158	2.8961	3.0074	2.6951	2.8313	2.826	2.7269	3.0449	2.5519	2.6098	2.2294	2.3056	2.6875	2.4737	2.4226	2.4435	2.2414	1.9786	1.7252	1.9848	2.1606	2.1292	2.2177	2.1902
SAT	0.21	0.2	0.22	0.28	0.21	0.4505	0.1356	0.2294	0.3049	0.1553	0.21	0.2642	0.2592	0.3027	0.1536	0.1795	2.0725	2.0653	2.5783	2.5835	2.0385	2.1495	2.026	2.5931	1.4169	1.3867	1.7551	1.3504	1.5834	1.3192	1.4069	1.6485	1.0865	0.8124	1.1781	1.0933	0.8802	1.0619	1.0741	1.0711
BAT	0.47	0.13	0.14	0.11	0.1344	0.2013	0.1132	0.1393	0.122	0.1231	0.1097	0.1224	0.1223	0.1173	0.1423	0.1396	0.1962	0.4011	0.3196	0.2703	0.2502	0.2128	0.3419	0.2033	0.3207	0.3265	0.2037	0.3072	0.261	0.2006	0.2588	0.2544	0.1852	0.2217	0.2737	0.2314	0.2608	0.2328	0.2365	0.2805
Lipid profile (mmol/L)
	NC			NC+LYP-H			HFD			HFD+LYP-L			HFD+LYP-H
TC	3.06115	2.91391	2.77855	2.50544	2.51019	3.00416	5.04888	5.189	5.10825	4.13329	3.89343	4.29478	3.0374	2.75718	2.96853
TG	0.556017	0.574929	0.641121	0.455782	0.554126	0.584385	1.27941	1.14986	0.926226	0.803297	0.671121	0.744904	0.564929	0.584385	0.598167
HDL	4.62516	4.32415	4.72584	5.02691	4.7275	5.12716	2.5162	2.51622	3.0183	3.01854	3.21792	3.51735	4.09184	3.71726	3.91815
LDL	0.560842	0.544565	0.645191	0.871599	0.58008	0.673307	2.63699	2.63108	2.1753	1.93705	2.01252	2.08799	1.23267	1.56858	1.50495
FFA	1.1371	1.18011	1.15591	1.23925	0.924731	1.17473	1.87097	2.24731	1.78226	1.39516	1.31989	1.51075	1.04301	1.20699	1.32258

## Sheet: Fig. 2
Adipocyte size (μm2)
	ND	ND+LYP-H	HFD	HFD+LYP-L	HFD+LYP-H
EAT	2.09166	1.9577	14.4021	5.0065	2.15103
	1.74948	2.1031	13.3223	5.87975	2.343
	1.8624	1.8611	13.3177	6.6914	2.2227
SAT	1.69714	1.75516	14.83	5.0839	4.14454
	1.7315	1.9217	15.8382	5.49953	3.6395
	1.3302	1.4367	17.4032	6.1254	3.3898
BAT	0.492	0.795	15.939	1.824	1.084
	0.629	1.01	11.27	2.105	0.921
	0.722	0.799	12.584	2.248	0.812
	1.117	0.95	9.819	2.846	1.776
	0.989	0.845	16.755	3.53	1.12

## Sheet: Fig. 3
VO2(mL/kg/hr)
Zeitgeber time (hr)	ND			ND+LPY-H			HFD			HFD-LYP-L			HFD-LYP-H
0	4498	4268	4256	3941	3776	3570	2804	2438	2422	2395	2361	2360	3464	3399	3242
1	3951	3763	3627	4403	4400	4300	2771	2653	2645	3079	2917	2882	3585	3425	3267
2	2991	2811	3094	3835	3585	3327	2455	2454	2422	2541	2508	2498	2566	2562	2546
3	2979	2752	3194	3449	3195	3231	2546	2527	2309	2647	2645	2573	2671	2662	2647
4	3578	3525	3343	4308	3798	3758	2479	2405	2395	2720	2597	2594	3022	2824	2818
5	3196	3077	2900	3264	3378	3112	2340	2265	2265	2525	2405	2383	2678	2637	2569
6	3260	3036	2803	3779	3388	3087	2141	2140	1999	2510	2382	2331	2635	2629	2578
7	2802	3098	2991	4000	3451	3063	2143	2048	2002	2292	2292	2214	2455	2384	2341
8	3195	3138	2561	3486	3442	3316	2266	2256	2135	2472	2426	2269	2528	2522	2505
9	2754	2584	2559	2947	2901	2820	2106	2097	1960	2478	2273	2118	2556	2535	2518
10	3002	2882	2856	4001	3308	3004	2176	2152	2087	2471	2335	2204	2655	2590	2496
11	2568	2502	2498	3171	2826	2725	2181	2141	2049	2352	2307	2292	2494	2468	2385
12	2768	2732	2633	3590	3215	3155	2090	2034	1990	2130	2111	2103	2620	2402	2210
13	2704	2694	2610	3187	3048	2767	2216	2157	2149	2355	2280	2277	2462	2418	2374
14	3575	2834	2928	3880	3380	3289	2178	2080	2073	2325	2282	2255	2391	2343	2327
15	3286	3251	2973	4261	3677	3668	2418	2369	2317	2507	2431	2425	2931	2887	2621
16	4544	4416	4364	4973	4919	4642	3817	3385	2825	3895	3883	3837	4191	4077	3983
17	4623	4438	4366	5133	5036	4642	3693	3669	3575	3987	3805	3693	4238	4111	4094
18	4552	4492	4345	5081	5060	4636	3511	3473	3261	3805	3583	3583	4266	3868	3821
19	4396	3982	4133	4509	4440	4229	3369	3126	2711	3728	3589	3440	4095	3999	3780
20	4216	3932	4004	4303	4207	4168	2948	2678	1913	3482	3374	3179	3582	3529	3493
21	4027	3921	3759	4413	4279	4256	2410	2157	2035	3046	3035	2841	3376	3309	3270
22	3972	3747	3615	4298	4162	3968	2660	2466	2444	2984	2860	2669	3400	3300	3015
23	3657	3592	3492	4041	4026	3772	2675	2581	2000	3342	3318	3075	3484	3402	3368
24	3937	3802	3689	4010	3967	3876	2750	2622	2114	3375	3093	3078	3719	3450	3443
VCO2(mL/kg/hr)
Zeitgeber time (hr)	ND			ND+LPY-H			HFD			HFD-LYP-L			HFD-LYP-H
0	4546	4479	3811	2202	3961	2242	3108	2985	3344	2675	2090	2950	2076	1930	2361
1	3816	3498	3145	4278	4254	4122	2296	2267	2177	2647	2327	2309	2933	2778	2747
2	2425	2377	2364	3468	3406	2898	2005	1986	1861	2053	2024	2009	2218	2195	2076
3	2454	2452	2442	3425	2608	2357	2175	2126	1856	2201	2198	2176	2271	2220	2214
4	3072	3057	2926	3771	3608	3100	2076	1933	1899	2268	2265	2246	2674	2637	2329
5	2594	2416	2360	2701	2984	2851	1930	1868	1843	2125	2050	2016	2241	2214	2164
6	2886	2696	2431	3030	3019	2970	1726	1708	1600	2003	1991	1952	2282	2149	2115
7	2661	2288	2205	3670	3257	2677	1877	1712	1665	1977	1954	1921	2074	2051	1994
8	2875	2322	2292	2998	2859	2806	1896	1885	1830	2055	2043	1978	2156	2144	2089
9	2582	2256	2209	2585	2513	2504	1769	1740	1637	1873	1830	1774	2077	2054	1893
10	2634	2633	2585	3806	3098	2845	1913	1900	1798	2109	1990	1946	2381	2309	2280
11	2346	2264	2240	2788	2611	2572	1930	1927	1889	2009	1968	1955	2096	2067	2022
12	2790	2487	2310	3261	2854	2772	1797	1734	1670	1990	1974	1801	2196	2138	1994
13	2485	2431	2386	3294	2496	2491	1906	1820	1774	2050	2006	1956	2257	2113	2100
14	2233	2210	2171	3562	2993	2661	1918	1906	1862	2007	1982	1973	2034	2033	2008
15	3372	3050	2857	4279	3582	3274	2082	2030	1924	2281	2181	2099	2669	2571	2286
16	4302	4270	4134	4552	4509	4299	3110	2814	2324	3349	3274	3270	4021	3853	3400
17	4360	4355	4296	4553	4481	4285	3039	2957	2900	3256	3238	3158	4136	3900	3428
18	4437	4306	4278	4463	4447	4441	2904	2890	2849	3112	3088	3021	3953	3350	3139
19	4163	4122	3701	4270	4257	4218	2754	2527	2330	3045	2986	2835	3552	3482	3144
20	3820	3748	3663	4318	4222	4071	2341	2100	1541	2842	2837	2799	3266	3007	2886
21	3825	3731	3573	4519	4035	3638	1952	1724	1621	2647	2414	2193	3167	2881	2740
22	3637	3587	3436	4267	3981	3364	2285	2055	2041	2401	2362	2354	2921	2906	2589
23	3445	3333	3269	4023	3799	3595	2196	2090	1781	2844	2757	2712	2898	2894	2868
24	3948	3532	3454	3975	3904	3771	2112	1728	1508	2740	2516	2258	2871	2848	2810
Heat( kcal/kg/hr)
Zeitgeber time (hr)	ND			ND+LPY-H			HFD			HFD-LYP-L			HFD-LYP-H
0	21.883	22.678	17.91	11.717	19.916	11.898	17.446	18.084	20.811	15.662	11.876	12.788	11.385	11.798	12.34
1	19.281	19.257	19.202	22.038	21.865	21.676	13.789	13.4	12.803	16.217	15.01	13.995	18.936	17.26	16.449
2	16.264	14.826	13.523	20.068	18.902	18.415	12.002	11.831	11.532	12.477	12.371	12.272	13.514	12.589	12.537
3	13.929	13.504	13.338	18.522	14.089	14.011	12.613	12.524	11.522	12.918	12.78	12.642	13.178	12.994	12.99
4	17.092	16.284	16.236	21.08	18.78	17.615	12.691	12.248	11.517	13.453	13.143	12.881	15.215	14.778	14.068
5	14.787	14.056	13.361	17.273	16.398	16.003	11.469	11.127	10.91	12.286	12.041	11.841	13.356	12.946	12.696
6	14.343	14.128	13.893	18.078	16.659	15.498	11.346	10.297	9.595	12.441	12.208	11.981	13.691	12.93	12.701
7	13.006	12.522	12.058	19.782	17.176	13.446	10.611	10.326	9.923	11.337	11.056	10.695	11.773	11.55	11.459
8	12.822	12.752	12.455	17.284	16.629	15.608	10.978	10.495	10.346	11.956	11.312	11.14	12.288	12.194	12.072
9	12.328	12.282	12.16	16.587	13.943	12.955	9.659	9.443	9.44	10.77	10.224	10.106	11.579	11.257	11.232
10	14.572	14.5	14.111	19.952	16.436	14.784	10.861	10.658	10.303	12.361	11.97	11.379	12.975	12.587	12.44
11	12.195	12.112	12.091	16.469	14.596	13.997	10.661	10.646	10.546	11.751	11.447	11.414	12.06	11.996	11.897
12	13.976	13.364	12.751	16.698	15.784	15.351	10.43	10.266	9.649	10.658	10.651	10.576	12.421	12.088	11.29
13	13.429	13.352	12.739	16.98	14.021	13.935	10.567	10.545	10.414	11.157	11.058	10.941	11.925	11.813	11.468
14	13.156	12.234	11.789	19.191	14.605	13.956	11.055	10.905	10.604	11.301	11.24	11.201	11.491	11.409	11.375
15	17.042	16.434	15.931	21.529	18.44	17.832	11.6	11.189	10.913	12.809	12.15	11.655	15.564	14.647	14.349
16	22.5	22.205	22.144	24.547	24.308	22.943	18.395	16.381	13.642	19.322	18.842	18.672	21.166	20.636	19.999
17	22.538	22.452	21.899	25.174	24.372	23.247	17.641	17.21	17.147	19.609	18.405	17.832	21.418	20.962	20.948
18	21.316	21.269	20.82	23.303	22.839	22.448	17.236	16.955	16.57	18.238	17.504	17.246	20.39	19.948	18.562
19	20.723	20.262	20.035	21.431	21.371	21.1	16.245	16.209	15.041	19.082	17.371	16.615	19.632	19.418	19.407
20	19.765	19.662	18.881	21.207	20.722	20.017	14.13	12.802	9.197	16.821	16.767	15.833	18.754	17.798	17.037
21	18.726	18.637	18.084	20.782	19.302	18.862	11.601	10.352	9.762	15.886	13.541	12.82	17.903	16.703	16.254
22	17.688	16.798	16.191	21.654	20.04	18.394	12.597	12.594	11.838	14.414	13.728	12.713	16.169	15.264	15.053
23	17.752	17.318	16.861	20.372	19.224	19.132	14.284	12.78	9.825	15.504	15.195	14.722	16.44	16.376	16.163
24	18.392	18.236	16.806	19.836	19.28	19.235	12.376	10.194	7.137	14.389	13.994	12.78	16.43	14.901	14.525
Total beam breaks (X+Y,counts)	ND			ND+LPY-H			HFD			HFD-LYP-L			HFD-LYP-H
Full day	1666.08	2685.24	1964.2	2687.04	2351.92	2899.08	1063.48	678.28	1162.56	2015.2	1461.56	1711.72	2655.92	2087.72	2905.84
Light	906	1152.08	1551.15	1551.15	1780.46	2094.46	524.692	153.077	531.231	1648.92	1171.23	1341.62	1840.62	1097.54	2001.62
Dark	2172.83	3029.5	3036.67	3604	2943.75	4102.08	1647.17	1247.25	1846.5	2395.33	1792.75	2112.67	3677.75	2971	3445.75
Food intake (g/day/mouse)	ND	ND+LYP-H	HFD	HFD+LYP-L	HFD+LYP-H
	2.56667	3.04167	2.95833	2.775	2.70833
	3.19167	3.14167	2.65833	2.91667	2.73333
	2.68333	3.08333	3.15	2.9	3.05
	3.53333	3.1	2.75833	2.825	3.06667
	3.325	3.3	2.93333	2.675	3.1
	3.35833	3.29167	3	2.85	3.025
	3.075	3.14167	3	2.98333	2.64167
	2.80333	3.2	3.31667	3.3	3.29167
	3.56667	3.34167	3.33333	3.225	3.20833

## Sheet: Fig. 4
Fast blood glucose (mmol)
ND	ND+LPY-H	HFD	HFD-LYP-L	HFD-LYP-H
6.5	5.9	14.3	8	7.5
6.9	6.1	12.7	9	6.4
7	6.8	12.4	8.5	6.9
6.6	6.3	11.3	8.3	7.5
7.2	5	14.6	8.3	7.5
6.4	5.9	12.5	9.3	6.2
6	6	10.9	7.3	8.2
5.4	6.2	10.2	9.7	7.1
OGTT
Time(min)	ND				ND+LYP-H				HFD				HFD+LYP-L				HFD+LYP-H
0	4.5	6.7	6.1	5.7	6.4	6.4	5.2	5.6	10.2	9.7	11.8	11.5	8.6	7.9	7.9	7.5	7.4	6.9	7.1	6.4
15	17.2	19	18.4	15.1	16.4	16.7	17.4	15.8	23.5	23.9	22.6	23	21	19.5	19.6	20	19	18.5	17.8	18.7
30	11.9	10.8	11.6	10.9	11.3	10.7	10.3	9.8	22	22.4	20	21.7	17.9	16.1	18.3	17.5	16	15.4	15.5	16.7
60	9.6	10.5	10.4	8.1	9.4	8.9	8	8.3	18.1	16.6	17.3	16	14.7	13.5	14.2	13	12.8	11.4	11.5	12.4
90	8.5	8.4	9.2	9.7	8	8.3	7.5	7.2	14.8	15.8	14.5	14.7	12.7	11.4	12.6	11.2	11.2	9.2	9.5	10.7
120	5.9	7.6	6.8	7.3	7.5	6.9	6.1	6.8	14.7	15	12.6	14.2	11.4	10	12.2	11.8	9	9.9	10.1	8.5
ITT
Time(min)	ND				ND+LYP-H				HFD				HFD+LYP-L				HFD+LYP-H
0	7.2	7.8	6.8	8.3	8.1	8.7	7.1	6.9	12.7	10.3	12.3	11.1	12	10.1	12.2	11.2	10	10.7	9.1	7.3
15	2.6	3.1	3.2	2	2	2.4	2.4	2.6	3.1	4.7	2.7	3.8	4.1	4.4	4.9	4.2	3.5	2.6	4.2	2.9
30	1.2	1.3	1.5	1.7	1.8	1.7	2.1	1.5	2.3	3.5	2.7	1.6	1.1	3.2	2	3.4	2.2	1.6	1.9	2.3
60	2.3	1.9	2.2	3	2.1	2	2.5	1.9	4.8	6.6	5.7	4.6	3.8	4	4.1	4.6	3.3	3.6	4	3
90	4.3	4.5	5.2	7	5	4	4.4	5.6	8.8	9.9	9.2	8.3	7.5	8.4	8.6	7	7	7.2	7.4	6.5
120	5.8	6.8	7.1	6.2	6.3	5.9	6.1	7.3	11	11.2	11.3	11.7	9.3	9.7	10.1	10.2	7.7	8.1	8.7	9.1
	ND	ND+LYP-H	HFD	HFD+LYP-L	HFD+LYP-H
Insulin (mIU/L)	5.60356	5.43543	23.9567	10.0558	6.40382
	6.21155	6.30155	24.8768	11.2085	7.88539
	4.69793	6.95168	21.2666	12.4983	8.25896
Glucagon (mIU/L)	10.3994	7.93703	33.9643	17.7827	14.7658
	7.61692	8.28696	35.6099	18.369	15.7682
	9.63584	9.31533	36.1017	18.927	13.0803

## Sheet: Fig. 5
	ND	ND+LYP-H	HFD	HFD+LYP-L	HFD+LYP-H
islet area(%)	22.7473	23.9113	52.4982	36.0993	27.0567
	24.9273	25.6213	55.7482	38.5093	29.2667
	20.5673	22.2013	49.2482	33.6893	24.8467
insulin area(%)	18.0142	16.8556	36.5938	27.8679	20.6389
	20.0942	18.3656	39.6438	30.1779	22.9489
	15.9342	15.3456	33.5438	25.5579	18.3289
glucagon area(%)	6.28185	7.08966	23.2557	11.8628	8.53682
	7.33185	8.39966	24.7657	12.9428	9.84682
	5.23185	5.77966	21.7457	10.7828	7.22682

## Sheet: Fig. 6
	ND	ND+LYP-H	HFD	HFD+LYP-L	HFD+LYP-H
CD11c+ F4/80+(%)	29.1	22	52.4	42.4	36.1
	31.29	23.75	55.25	44.08	37.55
	26.91	20.25	49.55	40.72	34.65
CD206+ F4/80+(%)	16.1	28.8	9.86	19.2	27.4
	17.29	29.95	11.71	20.88	28.85
	14.91	27.65	8.01	17.52	25.95
CD25+ Foxp3+(%)	18	19.1	10.3	13.7	16.4
	19.18	20.35	11.35	14.88	17.53
	16.82	17.85	9.25	12.52	15.27

## Sheet: Fig. 7
Cytokine concentration (pg/mL)
	ND				ND+LYP-H				HFD				HFD +LYP-L				HFD+LYP-H
TNFα	7.01764	7.42722	6.89486	5.65491	5.10742	7.0584	4.26983	4.05617	24.1334	28.3042	22.6965	29.4128	19.3228	15.546	14.3125	13.9325	8.20736	7.98259	8.79434	9.70007
IL-1β	16.5024	15.3237	15.2535	17.336	13.2085	12.6437	12.7875	10.069	30.7038	20.0144	30.8801	23.4616	18.5875	19.7498	23.8579	20.1831	16.0494	13.8844	16.4593	15.7352
IL-6	55.4248	52.774	54.0475	57.111	49.3512	40.441	45.141	47.3321	84.2514	90.0475	76.9251	85.7258	72.6723	73.6786	70.578	72.1939	56.4247	63.6641	59.6967	54.8167
IFN-γ	11.1466	9.52971	4.15339	7.57578	9.57005	8.44837	6.42089	12.096	24.1837	23.14	21.8059	17.8953	15.1912	12.2375	15.7186	10.3607	11.8285	7.68451	13.9333	7.96288
IL-1α	4.80532	4.51724	6.03641	4.10382	3.74291	4.07033	3.75673	4.75848	8.92738	8.15554	9.244	10.3661	5.22346	5.5932	6.02967	4.56147	4.72362	3.99789	2.13253	2.79923
MCP-1	16.3168	15.6524	15.7224	13.6978	10.1138	11.9109	8.68234	12.1878	34.2074	29.9811	25.8877	28.9007	25.5844	24.4642	25.4702	23.7749	20.0056	19.5768	18.2587	21.612
IL-4	26.4001	20.1064	27.8146	23.5794	28.6343	25.6039	21.636	29.3581	4.26849	2.8089	2.95267	3.07152	9.87563	8.63221	9.32373	10.5235	15.7617	13.9692	16.8745	16.4578
IL-10	43.7957	52.5245	47.4797	42.983	58.1885	47.3169	55.3282	56.7089	21.9039	27.6984	20.3617	19.4884	33.1729	37.7893	35.4227	39.4799	41.149	43.3739	45.3368	39.9676
IL-13	37.762	33.2363	35.3992	44.523	38.2397	39.7225	45.4447	42.9404	13.571	14.2059	12.059	12.3865	23.89	22.0704	20.5143	21.239	29.7253	30.6181	29.5141	31.9856
CCL5	24.9746	18.5521	26.325	20.9834	24.3015	25.8394	26.2231	21.1001	7.93524	8.14447	9.96379	8.28982	14.0148	14.8529	15.8866	12.9816	19.9403	18.8107	25.3765	21.4384
MCSF	15.0956	16.3993	18.0619	17.9316	19.3943	15.0294	16.0258	17.6292	2.27352	3.1487	4.2502	5.2321	8.94813	9.84088	8.60873	10.5632	15.0356	17.4281	15.7992	16.2865
CXCL1	11.3496	17.7954	12.1625	11.7671	12.6166	16.6494	15.3573	13.5633	3.02919	3.02874	1.06762	2.03683	6.78624	7.4051	8.47858	8.62432	11.0048	10.1493	11.051	9.11558
IL-17	2.80081	3.55672	2.93093	3.79485	4.27094	5.62454	3.54917	4.43491	27.7397	21.8676	22.7616	26.5205	13.4955	14.3918	11.1065	12.1075	6.377	5.94926	5.73309	6.02356
GM-CSF	4.4003	5.33173	4.01389	3.94899	2.94529	3.38497	3.6385	4.63041	9.31003	8.51011	7.26005	8.11649	8.79285	7.57676	6.43317	8.15869	7.21951	5.75117	7.22441	6.20568
IL-2	7.86753	6.23104	11.8276	7.86175	3.31509	5.1918	4.54007	4.7748	14.5295	15.5985	16.1403	14.0816	12.9577	14.9595	12.5956	17.1231	9.68831	9.29176	10.8147	10.3441
IL-5	26.2469	22.9397	22.5262	24.0409	16.6266	13.5926	19.4854	17.9638	41.9782	48.8093	42.7391	45.2832	34.2105	33.2901	48.2475	35.8805	30.545	33.3686	33.1382	30.7909
IL-12p70	18.89	17.0704	15.5143	15.239	13.571	14.2059	12.059	12.3865	43.2397	39.7225	45.4447	47.9404	27.762	33.2363	35.3992	24.5231	22.7253	20.6181	19.5141	19.9856
IL-9	25.6437	31.5401	27.7259	21.0298	34.3514	30.3441	32.2299	32.0512	5.74454	5.24277	6.05952	4.38868	8.2137	7.64323	9.54412	7.39126	9.40367	15.5822	12.2445	14.5222
IL-3	6.72953	8.55465	7.12978	9.20146	2.12061	20.2125	18.0465	12.6632	2.19931	2.02736	1.839	1.97382	2.23659	2.34005	2.60814	0.272239	4.51987	3.76354	3.48163	3.51777
VEGF	107.714	108.094	100.232	110.879	135.54	125.528	128.237	120.249	50.5226	67.5137	59.7	51.7532	72.8404	83.9287	75.5716	69.5454	98.5549	95.9142	97.6759	99.8649
mRNA expression (fold of change)
M1 marker	ND			ND+LYP-H			HFD			HFD +LYP-L			HFD+LYP-H
iNos	1.08706	1.04482	1.06322	1.23525	1.34941	1.1654	25.8401	23.2786	24.4514	19.5191	16.9557	17.7174	14.8018	10.1434	13.2621
Tnfa	1.09628	1.06106	1.06934	1.40218	1.20468	2.22818	17.7413	16.9054	15.6608	6.9497	5.18741	7.71853	2.63766	2.40791	3.28907
Il1b	1.08655	1.2442	1.03658	1.19072	1.03665	1.20203	7.1836	8.24128	9.56851	4.09225	4.12874	5.24034	2.80284	1.97202	2.39707
Il6	1.07197	1.09093	1.0592	1.88194	1.71571	1.6923	25.381	22.2269	24.0834	14.8775	15.1511	12.1815	7.44543	8.60784	9.60318
Ifng	1.02817	1.07368	1.05825	1.03861	1.03849	1.18692	12.2277	14.1003	16.6422	4.75871	6.96155	6.16717	1.93536	2.9759	3.88917
Il1a	0.997573	1.00181	1.00045	1.00661	1.17926	0.964117	5.68667	9.05214	6.11505	3.52359	2.90246	3.01775	2.84507	2.04076	1.22977
M2 marker	ND			ND+LYP-H			HFD			HFD +LYP-L			HFD+LYP-H
Cd206	1.06998	1.02285	1.08987	0.977104	1.08522	0.937808	0.252609	0.304417	0.304521	0.321516	0.45126	0.57337	0.672749	0.842933	0.747045
Cd163	1.10842	1.05696	1.01114	1.24549	1.01339	0.929141	0.0352833	0.0921236	0.035208	0.190731	0.267003	0.231873	0.387292	0.584145	0.324386
Arg1	1.07991	1.01331	1.04733	0.823607	0.970846	1.07796	0.348746	0.288507	0.100152	0.501302	0.491335	0.619455	0.640943	0.608403	0.821347
Il10	1.05741	1.09288	1.03323	1.11981	0.964546	0.955377	0.103311	0.127407	0.311595	0.560999	0.494563	0.525847	0.73806	0.636643	0.809801
Fizz1	1.06716	1.00403	1.10103	0.957183	0.844002	1.07568	0.217329	0.269901	0.18565	0.495342	0.5943	0.50492	0.696455	0.760096	0.762899
Ym1	1.08431	1.05311	1.0457	1.1597	0.938259	1.04539	0.249003	0.110386	0.262281	0.395661	0.520599	0.431971	0.687332	0.725239	0.489413
