# Supplementary material for: Large yellow tea polysaccharides ameliorate obesity-associated metabolic syndrome by promoting M2 polarization of adipose tissue macrophages
Source: Royal Society of Chemistry journal article supplement (doi:10.1039/d3fo01691a), 2023-01-01
Supplement: d3fo01691a2.pdf [file d3fo01691a2.pdf]

## **Supplemental Information**

### **Large yellow tea polysaccharide ameliorate obesity-associated metabolic syndrome by promoting M2 polarization of adipose tissue macrophage**

#### **Authors:**

Hongyan Wang<sup>1</sup>, Lan Wang<sup>1</sup>, Huijun Cheng<sup>2</sup>, Huifang Ge<sup>1</sup>, Zhongwen Xie<sup>1\*</sup>, Daxiang,  
Li<sup>1\*</sup>

#### **Affiliations:**

<sup>1</sup>State Key Laboratory of Tea Plant Biology and Utilization, School of Tea and Food  
Science and Technology, Anhui Agricultural University, Hefei Anhui 230036, People's  
Republic of China

<sup>2</sup>College of Life Sciences, Anhui Agricultural University, Hefei, Anhui 230036, People's  
Republic of China

#### **\*Correspondence authors:**

Zhongwen Xie (zhongwenxie@ahau.edu.cn); Daxiang, Li (dxli@ahau.edu.cn)

Table S1 The primer sequences used for qRT-PCR

|                 | Forward 5' to 3'        | Reverse 5' to 3'        |
|-----------------|-------------------------|-------------------------|
| <i>Cd206</i>    | GGAATCAAGGGCACAGAGTTA   | ATTGTGGAGCAGATGGAA      |
| <i>Cd163</i>    | CAGACTGGTTGGAGGAGAAATC  | TGACTTGTCTCTGGAAGCTG    |
| <i>Arg1</i>     | CAGAAGAATGGAAGAGTCAG    | CAGATATGCAGGGAGTCACC    |
| <i>Il10</i>     | TAAGTGCACCCACTTCCCAG    | AAGGCTTGGCAACCCAAGTA    |
| <i>Fizz1</i>    | CGTGGAGAATAAGGTCAAGGA   | CAGTAGCAGTCATCCCAGCA    |
| <i>Ym1</i>      | TCTCTACTCCTCAGAACCGTCAG | CGCATTCCTTCACCAGAAC     |
| <i>iNOS</i>     | TGGGAATGGAGACTGTCCCAG   | GGGATCTGAATGTGATGTTTG   |
| <i>Tnfa</i>     | GTTCTATGGCCCAGACCCTCACA | TCCCAGGTATATGGGCTCATACC |
| <i>IL1b</i>     | TGGGCCTCAAAGGAAAGAAT    | CAGGCTTGTGCTCTGCTTGT    |
| <i>Il6</i>      | GACAAAGCCAGAGTCCTTCAGA  | TGTGACTCCAGCTTATCTCTTGG |
| <i>Ifng</i>     | AGCAAGGCGAAAAAGGATGC    | TCATTGAATGCTTGGCGCTG    |
| <i>Il1a</i>     | TTGGTTAAATGACCTGCAACA   | GAGCGCTCACGAACAGTTG     |
| <i>18s rRNA</i> | AGAAACGGCCACATCCAA      | GGGTCGGGAGTGGGTAATTT    |
